# Supplementary material
Source: Research Square preprint supplement (doi:10.21203/rs.3.rs-9161270/v1)
Supplement: Supplementary file 1 [file 0fb6f7d6080e5b8ab4db2ba5.docx]

**Supplementary material 1: PPIE evaluation form for researchers**

**PRESTIGE-PTB- Post-PPI Group Evaluation Form – Researchers**

In order for us to understand how this event made an impact on your work, please complete the questions below.

1. Did you get any insight from the public from the **PPIE meetings?** If yes, what? If no, please explain.
2. What impact did these **PPIE meetings** have on your project? Has anything changed for the better or worse, or worked more or less successfully as a result? Please explain.
3. Has working with members of the public during **PPIE meetings** had any impact or effect on you personally? If yes, how? If no, please explain.
4. What issues or barriers, if any, did you face during **PPIE meetings**? Please describe.
5. If you were to repeat **PPIE meetings**, what would you do differently? For example, did the group meet too frequently or not enough? Was the online meeting the most preferable format, or is there another method you’d suggest?

**Quantitative Questions**

1. How much experience of PPIE work did you have before these meetings?

| 1  No experience | 2  Basic familiarity | 3  Moderate experience | 4  Strong experience | 5  Extensive experience |
| --- | --- | --- | --- | --- |

1. Do you feel you gained experience in PPIE work after these meetings?

| 1  Strongly disagree | 2  Disagree | 3  Neutral | 4  Agree | 5  Strongly agree |
| --- | --- | --- | --- | --- |

1. Has your knowledge/perspective expanded as a result of these PPIE meetings?

| 1  Strongly disagree | 2  Disagree | 3  Neutral | 4  Agree | 5  Strongly agree |
| --- | --- | --- | --- | --- |

1. Involvement in these PPIE meetings met my expectations

| 1  Strongly disagree | 2  Disagree | 3  Neutral | 4  Agree | 5  Strongly agree |
| --- | --- | --- | --- | --- |

1. How impactful do you think the PPIE meetings were?

| 1  Not at all impactful | 2  Slightly impactful | 3  Moderately impactful | 4  Very impactful | 5  Extremely impactful |
| --- | --- | --- | --- | --- |

1. How likely is it that you would involve a PPIE group in a project again?

| 1  Not at all likely | 2  Slightly likely | 3  Moderately likely | 4  Very likely | 5  Extremely likely |
| --- | --- | --- | --- | --- |

1. How did PPIE group involvement impact recruitment?

| 1  Not at all impactful | 2  Slightly impactful | 3  Moderately impactful | 4  Very impactful | 5  Extremely impactful |
| --- | --- | --- | --- | --- |

1. How did PPIE group involvement impact study materials?

| 1  Not at all impactful | 2  Slightly impactful | 3  Moderately impactful | 4  Very impactful | 5  Extremely impactful |
| --- | --- | --- | --- | --- |

1. How did PPIE group involvement impact communicating with patients?

| 1  Not at all impactful | 2  Slightly impactful | 3  Moderately impactful | 4  Very impactful | 5  Extremely impactful |
| --- | --- | --- | --- | --- |

1. How did PPIE group involvement impact the study method?

| 1  Not at all impactful | 2  Slightly impactful | 3  Moderately impactful | 4  Very impactful | 5  Extremely impactful |
| --- | --- | --- | --- | --- |

1. How did PPIE group involvement impact inclusivity / equity in participation?

| 1  Not at all impactful | 2  Slightly impactful | 3  Moderately impactful | 4  Very impactful | 5  Extremely impactful |
| --- | --- | --- | --- | --- |
