# Supplementary material
Source: Research Square preprint supplement (doi:10.21203/rs.3.rs-9161270/v1)
Supplement: Supplementary file 2 [file 2918e1be32eb713a994c7b07.docx]

**Supplementary material 3: The completed GRIPP2 short-form checklist**

| Section and topic | Item | Reported on page No |
| --- | --- | --- |
| 1: Aim | Report the aim of PPI in the study | 4-6 |
| 2: Methods | Provide a clear description of the methods used for PPI in the study | 6-8 |
| 3: Study results | Outcomes—Report the results of PPI in the study, including both positive and negative outcomes | 9-17 |
| 4: Discussion and conclusions | Outcomes—Comment on the extent to which PPI influenced the study overall. Describe positive and negative effects | 17-20 |
| 5: Reflections/critical perspective | Comment critically on the study, reflecting on the things that went well and those that did not, so others can learn from this experience | 19 |

PPI=patient and public involvement
