# Supplementary material
Source: Research Square preprint supplement (doi:10.21203/rs.3.rs-9161270/v1)
Supplement: Supplementary file 3 [file c897f501603de39473820130.docx]

**Supplementary material 2: PPIE evaluation form for PPIE members**

**PRESTIGE-PTB- Post-PPI Event Evaluation Form – Members of the Public**

Please complete the questions below to help us to understand what impact this event has had on you and so we can learn how to improve our way of working. There are no right or wrong answers.

1. Has your knowledge, perspective or attitude towards PRESTIGE-PTB or research in general changed in any way as a result of the PPIE meetings?

1. What do you feel you’ve gained from taking part in these PPIE meetings? Have they met your expectations?
2. Do you think your involvement in the PPIE meetings has made a difference to the work our researchers are doing? If yes, please tell us how? If no, please explain why?
3. Is there anything we could do differently that might improve both the experience and impact of your involvement? For example, did the group meet too frequently or not enough? Was the online meeting the most preferable format, or is there another method you would suggest?

**Quantitative questions**

1. How confident did you feel to support the project as a PPIE member before these meetings?

| 1  Not confident | 2  Slightly confident | 3  Moderately confident | 4  Very confident | 5  Extremely confident |
| --- | --- | --- | --- | --- |

1. How confident do you feel to support the project as a PPIE member after these meetings?

| 1  Not confident | 2  Slightly confident | 3  Moderately confident | 4  Very confident | 5  Extremely confident |
| --- | --- | --- | --- | --- |

1. Has your knowledge/perspective/skills has improved as a result of these PPIE activities?

| 1  Strongly disagree | 2  Disagree | 3  Neutral | 4  Agree | 5  Strongly agree |
| --- | --- | --- | --- | --- |

1. Involvement in this PPIE group met my expectations

| 1  Strongly disagree | 2  Disagree | 3  Neutral | 4  Agree | 5  Strongly agree |
| --- | --- | --- | --- | --- |

1. How impactful do you think the PPIE group involvement was?

| 1  Not at all impactful | 2  Slightly impactful | 3  Moderately impactful | 4  Very impactful | 5  Extremely impactful |
| --- | --- | --- | --- | --- |

1. How likely is it that you would participate in a PPIE group again?

| 1  Not at all likely | 2  Slightly likely | 3  Moderately likely | 4  Very likely | 5  Extremely likely |
| --- | --- | --- | --- | --- |
