# Supplementary material
Source: Research Square preprint supplement (doi:10.21203/rs.3.rs-9161270/v1)
Supplement: Supplementary file 4 [file d54bfb9ad772eb0f250415d6.pdf]

Supplementary material 4: Social media advertisement

Genomics England IMPERIAL Tommy's The pregnancy and baby charity PRESTIGE-PTB

## Have you experienced a preterm birth?

Join the PRESTIGE-PTB study to help us better understand preterm birth

Across the UK, 1 in 13 babies are born prematurely. We know that ethnicity has an impact on the chances of a baby being born too soon. We are inviting people from all ethnic backgrounds who have experienced a spontaneous preterm birth to join our research.

PRESTIGE-PTB Study, IRAS: 339022, 20 Mar 2025, V1.3

Image1

Genomics England IMPERIAL Tommy's The pregnancy and baby charity PRESTIGE-PTB

## Have you experienced a preterm birth?

Join the PRESTIGE-PTB study to help us better understand preterm birth

Across the UK, 1 in 13 babies are born prematurely. We know that ethnicity has an impact on the chances of a baby being born too soon. We are inviting people from all ethnic backgrounds who have experienced a spontaneous preterm birth to join our research.

PRESTIGE-PTB Study, IRAS: 339022, 20 Marc 2025, V1.3

Image2

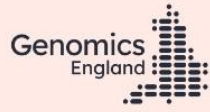

IMPERIAL

Tommy's  
The pregnancy and baby charity

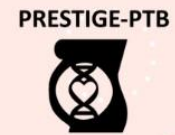

## Have you experienced a preterm birth? Join the PRESTIGE-PTB study to help us better understand preterm birth

Across the UK, 1 in 13 babies are born prematurely. We know that ethnicity has an impact on the chances of a baby being born too soon. We are inviting people from all ethnic backgrounds who have experienced a spontaneous preterm birth to join our research.

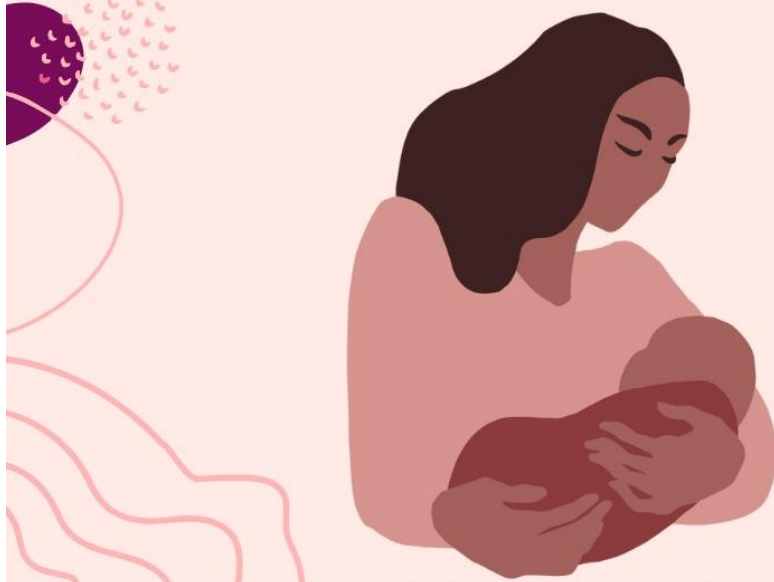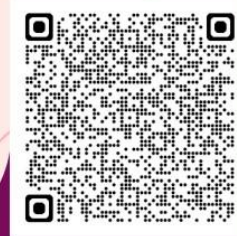

PRESTIGE-PTB Study, IRAS: 339022, 20 Mar 2025, V1.3

Image3

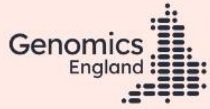

IMPERIAL

Tommy's  
The pregnancy and baby charity

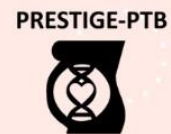

## Have you experienced a preterm birth? Join the PRESTIGE-PTB study to help us better understand preterm birth

Across the UK, 1 in 13 babies are born prematurely. We know that ethnicity has an impact on the chances of a baby being born too soon. We are inviting people from all ethnic backgrounds who have experienced a spontaneous preterm birth to join our research.

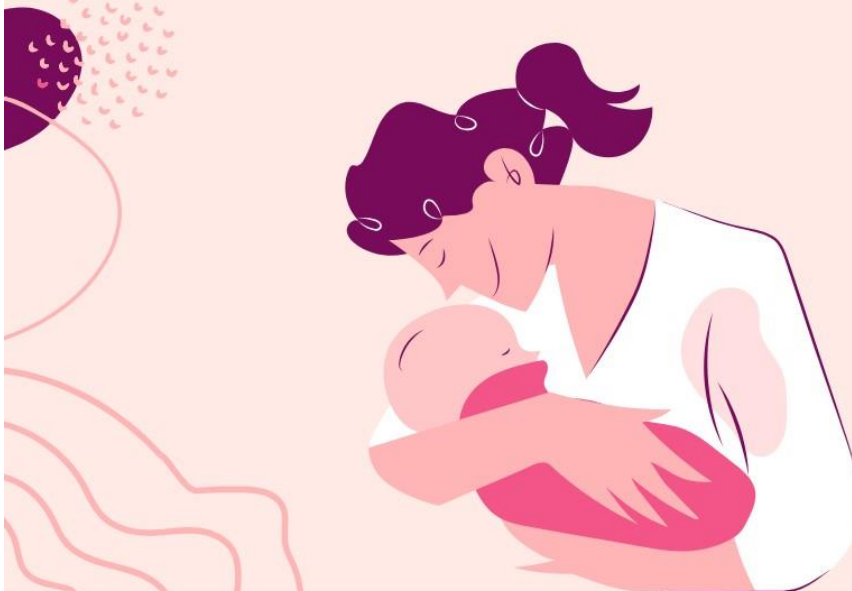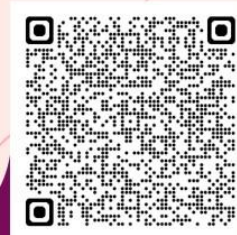

PRESTIGE-PTB Study, IRAS: 339022, 20 Mar 2025, V1.3

Image4

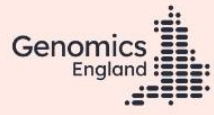

IMPERIAL

Tommy's  
The pregnancy and baby charity

PRESTIGE-PTB

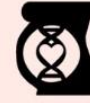

## Have you experienced a preterm birth?

Join the PRESTIGE-PTB study to help us better understand preterm birth

Across the UK, 1 in 13 babies are born prematurely. We know that ethnicity has an impact on the chances of a baby being born too soon. We are inviting people from all ethnic backgrounds who have experienced a spontaneous preterm birth to join our research.

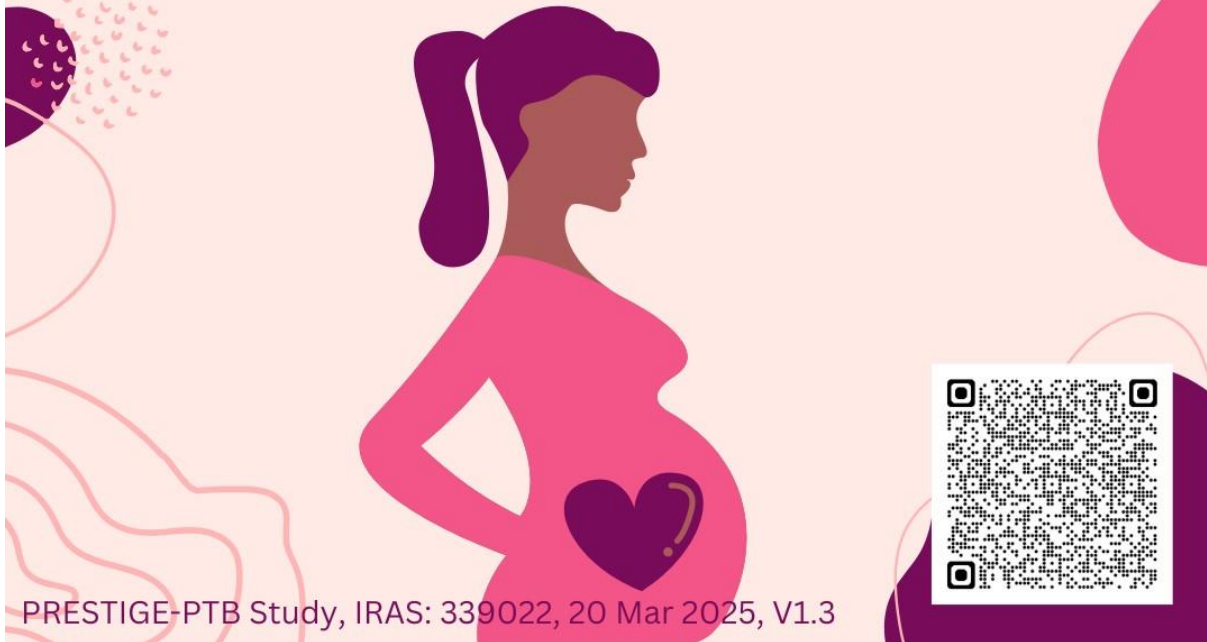

PRESTIGE-PTB Study, IRAS: 339022, 20 Mar 2025, V1.3

Image5
